# Supplementary material for: Dietary Intakes and Dietary Quality during Pregnancy in Women with and without Gestational Diabetes Mellitus - A Norwegian Longitudinal Study
Source: PubMed Central journal article supplement (PMC6266178; doi:10.3390/nu10111811), 2018-11-20
Supplement: nutrients-10-01811-s001.pdf [file nutrients-10-01811-s001.pdf]

**Table S1.** Variables showing correlations with 18–22 week fasting glucose.

|                             | <b>Correlation Coefficient</b> | <b><i>p</i>-Value*</b> |
|-----------------------------|--------------------------------|------------------------|
| 18–22 week whey cheese      | –0.086                         | 0.023                  |
| Pre-pregnancy BMI           | 0.281                          | <0.001                 |
| Pre-pregnancy weight        | 0.243                          | <0.001                 |
| 18–22 week weight           | 0.260                          | <0.001                 |
| Maternal age at study entry | 0.210                          | <0.001                 |

\*Analyzed with Pearson’s Correlation Coefficient for normally distributed data and Spearman rank correlation coefficient for skewed data.

**Table S2.** Variables showing correlations with 18–22 week 2-hour glucose.

|                             | <b>Correlation Coefficient</b> | <b><i>p</i>-Value*</b> |
|-----------------------------|--------------------------------|------------------------|
| 18–22 week cereals          | –0.088                         | 0.011                  |
| 18–22 week eggs             | –0.092                         | 0.016                  |
| 18–22 week whey cheese      | –0.088                         | 0.020                  |
| 18–22 week fat (g/day)      | –0.076                         | 0.046                  |
| 18–22 week cholesterol      | –0.112                         | 0.003                  |
| 18–22 week vitamin D        | –0.111                         | 0.004                  |
| Pre-pregnancy weight        | 0.155                          | <0.001                 |
| Pre-pregnancy BMI           | 0.242                          | <0.001                 |
| 18–22 week weight           | 0.183                          | <0.001                 |
| Maternal age at study entry | 0.107                          | 0.006                  |

\*Analyzed with Pearson’s Correlation Coefficient for normally distributed data and Spearman rank correlation coefficient for skewed data.

**Table S3.** Variables showing correlations with 32–36 week fasting glucose.

|                                       | <b>Correlation Coefficient</b> | <b><i>p</i>-Value*</b> |
|---------------------------------------|--------------------------------|------------------------|
| 18–22 week dairy products             | –0.084                         | 0.026                  |
| 18–22 week cheese                     | –0.084                         | 0.026                  |
| 18–22 week beverages                  | 0.080                          | 0.035                  |
| 18–22 week whey cheese                | –0.144                         | <0.001                 |
| 18–22 week milk and yoghurt           | –0.086                         | 0.022                  |
| 18–22 week protein (g/d)              | –0.080                         | 0.088                  |
| 32–36 week dairy products             | –0.085                         | 0.025                  |
| 32–36 week French fries               | 0.114                          | 0.002                  |
| 32–36 week milk and yoghurt           | –0.093                         | 0.014                  |
| 32–36 week cream/sour cream/ice cream | 0.095                          | 0.012                  |
| Pre-pregnancy BMI                     | 0.267                          | <0.001                 |
| Pre-pregnancy weight                  | 0.267                          | <0.001                 |
| 18–22 week weight                     | 0.285                          | <0.001                 |
| 32–36 week weight                     | 0.260                          | <0.001                 |
| Maternal age at study entry           | 0.095                          | 0.013                  |

\*Analyzed with Pearson’s Correlation Coefficient for normally distributed data and Spearman rank correlation coefficient for skewed data.

**Table S4.** Variables showing correlations with 32–36 week 2-hour glucose.

|                             | <b>Correlation Coefficient</b> | <b><i>p</i>-Value*</b> |
|-----------------------------|--------------------------------|------------------------|
| Maternal age at study entry | 0.157                          | <0.001                 |
| Pre-pregnancy BMI           | 0.161                          | <0.001                 |
| Pre-pregnancy exercising    | –0.086                         | 0.023                  |

\*Analyzed with Pearson's Correlation Coefficient for normally distributed data and Spearman rank correlation coefficient for skewed data.

**Table S5.** Variables showing linear relationships with 18–22 weeks fasting glucose (N = 702), analyzed with one-way ANOVA.

|                             |         | <b>B* (95% CI)</b>     | <b>p-Value</b> |
|-----------------------------|---------|------------------------|----------------|
| 18–22 week whey cheese      | N = 702 | -0.001 (-0.003, 0.001) | 0.295          |
| Pre-pregnancy BMI           | N = 699 | 0.034 (0.017, 0.051)   | <0.001         |
| Pre-pregnancy weight        | N = 699 | -0.010 (-0.020, 0.000) | 0.057          |
| 18–22 week weight           | N = 700 | 0.009 (0.000, 0.018)   | 0.056          |
| Maternal age at study entry | N = 702 | 0.016 (0.010, 0.023)   | <0.001         |

\*  $\beta$  = beta coefficient.

**Table S6.** Variables showing linear relationships with 18–22 weeks 2-hour glucose (N = 702), analyzed with one-way ANOVA.

|                             |         | <b>B* (95% CI)</b>      | <b>p-Value</b> |
|-----------------------------|---------|-------------------------|----------------|
| 18–22 week cereals          | N = 702 | 0.000 (-0.002, 0.002)   | 0.695          |
| 18–22 week eggs             | N = 702 | -0.002 (-0.013, 0.008)  | 0.672          |
| 18–22 week whey cheese      | N = 702 | -0.004 (-0.011, 0.002)  | 0.172          |
| 18–22 week fat (g/d)        | N = 702 | 0.001 (-0.004, 0.006)   | 0.652          |
| 18–22 week cholesterol      | N = 702 | -0.001 (-0.003, 0.001)  | 0.569          |
| 18–22 week vitamin D        | N = 702 | -0.006 (-0.018, 0.005)  | 0.282          |
| Pre-pregnancy weight        | N = 699 | -0.054 (-0.085, -0.024) | 0.001          |
| Pre-pregnancy BMI           | N = 699 | 0.142 (0.092, 0.193)    | <0.001         |
| 18–22 week weight           | N = 700 | 0.031 (0.004, 0.057)    | 0.022          |
| Maternal age at study entry | N = 702 | 0.019 (0.001, 0.037)    | 0.035          |

\*  $\beta$  = beta coefficient.

**Table S7.** Variables showing linear relationships with 32–36 weeks fasting glucose (N = 702), analyzed with one-way ANOVA.

|                                       |         | <b>B* (95% CI)</b>             | <b>p-Value</b> |
|---------------------------------------|---------|--------------------------------|----------------|
| 18–22 week dairy products             | N = 702 | -0.001 (-0.003, 0.001)         | 0.366          |
| 18–22 week cheese                     | N = 702 | -0.001 (-0.002, 0.001)         | 0.387          |
| 18–22 week beverages                  | N = 702 | 9.975E-6 (-4.151E-5, 6.156E-5) | 0.704          |
| 18–22 week whey cheese                | N = 702 | -0.002 (-0.004, 0.001)         | 0.287          |
| 18–22 week milk and yoghurt           | N = 702 | 0.001 (-0.001, 0.002)          | 0.393          |
| 18–22 week protein (g/d)              | N = 702 | 0.000 (-0.002, 0.002)          | 0.829          |
| 32–36 week dairy products             | N = 701 | 0.113 (-0.456, 0.682)          | 0.696          |
| 32–36 week French fries               | N = 702 | 0.003 (-0.001, 0.007)          | 0.097          |
| 32–36 week milk and yoghurt           | N = 702 | -0.113 (-0.682, 0.455)         | 0.696          |
| 32–36 week cream/sour cream/ice cream | N = 702 | -0.113 (-0.681, 0.456)         | 0.697          |
| Pre-pregnancy BMI                     | N = 699 | 0.032 (0.012, 0.052)           | 0.002          |
| Pre-pregnancy weight                  | N = 699 | -0.014 (-0.026, -0.002)        | 0.026          |
| 18–22 week weight                     | N = 700 | 0.023 (0.007, 0.040)           | 0.006          |
| 32–36 week weight                     | N = 699 | -0.007 (-0.019, 0.005)         | 0.238          |
| Maternal age at study entry           | N = 702 | 0.007 (-0.001, 0.014)          | 0.074          |

\*  $\beta$  = beta coefficient.

**Table S8.** Variables showing linear relationships with 32–36 weeks 2-hour glucose (N = 702), analyzed with one-way ANOVA.

|                                 |         | <b>B* (95% CI)</b>   | <b>p-Value</b> |
|---------------------------------|---------|----------------------|----------------|
| Maternal age at study entry     | N = 702 | 0.042 (0.021, 0.063) | <0.001         |
| Pre-pregnancy BMI               | N = 699 | 0.065 (0.035, 0.094) | <0.001         |
| Pre-pregnancy exercising (= no) | N = 457 | 0.193 (0.005, 0.381) | 0.045          |

\*  $\beta$  = beta coefficient.
